# Supplementary material for: Metabolomics and Cheminformatics Analysis of Antifungal Function of Plant Metabolites
Source: PubMed Central journal article supplement (PMC5192437; doi:10.3390/metabo6040031), 2016-09-30
Supplement: metabolites-06-00031-s001.pdf [file metabolites-06-00031-s001.pdf]

# Supplementary Materials: Metabolomics and Cheminformatics Analysis of Antifungal Function of Plant Metabolites

Miroslava Cuperlovic-Culf, NandhaKishore Rajagopalan, Dan Tulpan and Michele C. Loewen

List of resistance related metabolites obtained from referenced publications with their plant origin.

| Pubchem (CID) | Metabolite                                                     | Synonym                  | Plant Origin                        | Reference                           |
|---------------|----------------------------------------------------------------|--------------------------|-------------------------------------|-------------------------------------|
| 179           | 3-hydroxy-2-butanone                                           | -                        | Chickpea volatiles                  | Cruz, 2012                          |
| 445154        | Resveratrol                                                    | -                        | General resistance                  | Lattanzio, 2006                     |
| 199           | Agmatine                                                       | -                        | Wheat                               | Gunnaiah, 2012                      |
| 243           | Benzoic acid                                                   | -                        | Wheat                               | Hamzehzarghani, 2005                |
| 264           | Butanoic acid                                                  | -                        | Wheat                               | Hamzehzarghani, thesis              |
| 273           | Cadaverine                                                     | 1,5-Diaminopentane       | Wheat                               | Hamzehzarghani, PhD                 |
| 311           | Citric acid                                                    | -                        | Barley                              | Bollina, 2010                       |
| 323           | Coumarin                                                       | -                        | barley                              | Chamarthi, 2014                     |
| 338           | <i>p</i> -hydroxybenzoic acid                                  | salicylic acid           | Wheat                               | Gunnaiah, 2012                      |
| 370           | 5- <i>O</i> - $\beta$ -glucoside of gentisic acid, gallic acid | gallic acid              | Wheat                               | Boutigny, 2010                      |
| 424           | Aspartic acid                                                  | -                        | Wheat; Barley                       | Hamzehzarghani, PhD; Bollina, 2010  |
| 441           | $\beta$ -D-glucopyranosyl-sinapic acid                         | beta-Hydroxybutyric acid | Wheat                               | Gunnaiah, 2012                      |
| 469           | 2-Aminoadipic acid                                             | -                        | Barley                              | Bollina, 2010                       |
| 674           | dimethylamine                                                  | -                        | Chickpea volatiles                  | Cruz, 2012                          |
| 750           | Glycine                                                        | -                        | Wheat                               | Hamzehzarghani, PhD                 |
| 753           | Glycerol                                                       | -                        | barley                              | Bollina, 2011                       |
| 754           | glycerol-3-phosphate                                           | -                        | signaling molecule                  | Dempsey, 2012                       |
| 760           | Glyoxylate/Oxaloacetic acid                                    | -                        | Wheat (Sumai-3)                     | Gunnaiah, 2014                      |
| 801           | auxin                                                          | -                        | hormon                              | Petti, 2012                         |
| 802           | Indole-3-acetate                                               | -                        | wheat                               | Gunnaiah, PhD                       |
| 811           | 2-methylsuccinic acid                                          | Itaconic acid            | Wheat                               | Gunnaiah, PhD                       |
| 847           | Methionine sulfoxide                                           | -                        | Barley                              | Bollina, 2011                       |
| 849           | pipecolic acid                                                 | -                        | Systemic acquired resistance factor | D'maris, 2012                       |
| 867           | Malonic acid                                                   | Malonic acid             | Wheat; Barley                       | Hamzehzarghi, 2005; Bollina, 2010   |
| 892           | Myoinositol                                                    | -                        | Wheat                               | Gunnaiah, PhD; Hamzehzarghani, 2012 |
| 931           | naphthalene                                                    | -                        | Chickpea volatiles                  | Cruz, 2012                          |
| 932           | naringenin                                                     | -                        | Wheat; barley                       | Gunnaiah, PhD; Bollina, 2011        |

|      |                                        |                            |                                     |                                            |
|------|----------------------------------------|----------------------------|-------------------------------------|--------------------------------------------|
| 985  | palmitic acid                          | Hexadecanoic acid          | Wheat                               | Hamzehzarghi, 2005                         |
| 991  | Briaexcavatin O                        | Parathion                  | Barley                              | Bollina, 2011                              |
| 999  | benzeneacetic acid                     | -                          | wheat                               | Paranidharan, 2008                         |
| 1004 | Phosphoric acid                        | -                          | Wheat                               | Hamzehzarghi, 2005                         |
| 1032 | Propanoic acid                         | -                          | Wheat                               | Hamzehzarghi, 2005                         |
| 1045 | putrescine                             | 1,4-Butanediamine          | Wheat                               | Hamzehzarghi, PhD                          |
| 1057 | Pyrogallol                             | -                          | Barley                              | Bollina, 2011                              |
| 1060 | Pyruvic acid                           | -                          | Barley                              | Bollina, 2010                              |
| 1103 | spermine                               | -                          | Wheat                               | Gunnaiah, PhD                              |
| 1110 | Succinic Acid                          | Butanedioic acid           | Wheat                               | Hamzehzarghi, PhD                          |
| 1150 | tryptamine                             | -                          | wheat                               | Pasquet, 2014                              |
| 1662 | 3-hydroxy-3-methylglutaric acid        | -                          | barley                              | Bollina, 2011                              |
| 1826 | 3-Indoleacetic Acid                    | 5-Hydroxyindoleacetic acid | wheat                               | Gunnaiah, PhD                              |
| 2102 | $\alpha$ -cyano-4-hydroxycinnamic acid | -                          | barley                              | Bollina, 2011                              |
| 2266 | azelaic acid                           | -                          | Systemic acquired resistance factor | D'Maris, 2012                              |
| 2519 | Caffeine                               | Guaranine                  | barley                              | Chamarthi, 2014                            |
| 2969 | Capric acid                            | -                          | Barley                              | Bollina, 2010                              |
| 3301 | 1,2-Ethanediamine                      | -                          | Wheat                               | Hamzehzarghani, 2005                       |
| 3314 | Eugenol                                | -                          | Wheat (Sumai-3)                     | Gunnaiah, 2014                             |
| 3449 | (S)-Malate                             | -                          | Wheat (Sumai-3)                     | Gunnaiah, 2014                             |
| 3830 | cytokinin                              | -                          | plant hormon                        | Bari, 2009                                 |
| 3893 | Lauric acid                            | -                          | Barley                              | Bollina, 2010                              |
| 4133 | methyl salicylate                      | -                          | Systemic acquired resistance factor | D'Maris, 2012                              |
| 4992 | N-Methylheteropsine                    | Pyrilamine                 | barley                              | Bollina, 2011                              |
| 5192 | Sebacic acid                           | -                          | wheat                               | Gunnaiah, PhD                              |
| 5202 | Serotonin                              | -                          | wheat                               | Gunnaiah, PhD;<br>Pasquet, 2014            |
| 5281 | Octadecanoic acid                      | stearic acid               | Wheat                               | Hamzehzarghani, 2012                       |
| 5950 | L-Alanine                              | -                          | Wheat                               | Hamzehzarghani, PhD                        |
| 5960 | L-aspartate                            | -                          | wheat                               | Gunnaiah, PhD                              |
| 5961 | Glutamine                              | -                          | wheat                               | Hamzehzarghi, PhD                          |
| 5984 | D-Fructose                             | -                          | Wheat                               | Hamzehzarghani, 2005                       |
| 5988 | O-a-D-Glucopyranoside                  | Sucrose                    | Wheat                               | Hamzehzarghani, 2012                       |
| 6036 | galactose                              | -                          | Wheat                               | Hamzehzarghani, PhD;<br>Paranidharan, 2008 |
| 6137 | Methionine                             | -                          | barley                              | Bollina, 2011                              |
| 6140 | L-phenylalanine                        | -                          | Wheat                               | Gunnaiah, 2012                             |
| 6251 | D-Mannitol                             | -                          | Wheat                               | Gunnaiah, PhD                              |
| 6262 | ornithine                              | -                          | wheat                               | Paranidharan, 2008                         |

|       |                                     |                         |                         |                                       |
|-------|-------------------------------------|-------------------------|-------------------------|---------------------------------------|
| 6267  | L-asparagine                        | -                       | wheat                   | Paranidharan, 2008;<br>Gunnaiah, 2014 |
| 6274  | Histidine                           | -                       | Wheat (Sumai-3)         | Gunnaiah, 2014                        |
| 6305  | L-Tryptophan,                       | -                       | Wheat (Sumai-3)         | Gunnaiah, 2014;<br>Pasquet, 2014      |
| 6306  | Isoleucine                          | -                       | barley                  | Bollina, 2011                         |
| 6322  | arginine                            | L-Arginine              | barley                  | Bollina, 2010                         |
| 6325  | ethylene                            | -                       | plant hormon            | Bari, 2009                            |
| 6466  | gibberellin                         | -                       | plant hormon            | Bari, 2009                            |
| 6508  | Quinic acid                         | -                       | barley; wheat           | Bollina, 2010; Gunnaiah,<br>PhD       |
| 6560  | 2-methyl-1-propanol                 | -                       | Chickpea volatiles      | Cruz, 2012                            |
| 6581  | 2-Propenoic acid                    | acrylic acid            | Wheat                   | Hamzehzarghani, PhD                   |
| 6613  | Pantothenic acid                    | -                       | barley                  | Bollina, 2011                         |
| 6802  | Guanosine                           | -                       | barley; Wheat (Sumai-3) | Bollina, 2011; Gunnaiah,<br>2014      |
| 7150  | Methylbenzoate                      | -                       | Wheat                   | Gunniah, PhD                          |
| 7311  | 2,4-bis(1,1-dimethylethyl)-, Phenol | 2,4-di-tert-butylphenol | Wheat                   | Hamzehzarghani, 2012                  |
| 7405  | Pyroglutamic acid                   | -                       | Barley                  | Bollina, 2010; 2011                   |
| 7427  | Trehalose                           | -                       | Wheat                   | Hamzehzarghani, PhD                   |
| 7456  | 3-methyl-phenol                     | -                       | Chickpea volatiles      | Cruz, 2012                            |
| 7469  | Hydroxyacetophenone                 | -                       | Wheat                   | Gunniah, PhD                          |
| 7478  | anisic acid                         | -                       | wheat                   | Paranidharan, 2008                    |
| 7670  | N-ethyl-benzenamine                 | -                       | Chickpea volatiles      | Cruz, 2012                            |
| 7720  | 2-ethyl-1-hexanol                   | -                       | Chickpea volatiles      | Cruz, 2012                            |
| 7966  | Cyclohexanol                        | -                       | Wheat                   | Hamzehzarghani, PhD                   |
| 8020  | dimethoxy methane                   | -                       | Chickpea volatiles      | Cruz, 2012                            |
| 8103  | 1-hexanol                           | -                       | Barley                  | Bollina, 2011                         |
| 8180  | Undecanoic acid                     | -                       | Barley                  | Bollina, 2010                         |
| 8468  | vanillic acid                       | -                       | wheat                   | Bourigny, 2008                        |
| 8629  | UDP-glucose                         | -                       | Wheat; barley           | Gunniah, PhD; Bollina,<br>2011        |
| 8742  | Shikimic acid                       | -                       | wheat                   | Stamova, 2008                         |
| 8914  | nonanol                             | -                       | Chickpea volatiles      | Cruz, 2012                            |
| 8955  | 3 $\beta$ -Hydroxycinnamolide       | -                       | Barley                  | Bollina, 2010                         |
| 9064  | Catechin                            | -                       | general resistance      | Lattanzio, 2006                       |
| 9958  | 4-Methylcatechol                    | -                       | Wheat                   | Gunniah, PhD                          |
| 10185 | dihydroquercetin                    | -                       | general resistance      | Lattanzio, 2006                       |
| 10286 | 4H-1-Benzopyran-4-one               | -                       | Wheat                   | Hamzehzarghani, PhD                   |
| 10465 | Heptadecanoic acid                  | -                       | wheat; barley           | Hamzehzarghani, 2005;<br>Bollina 2011 |

|       |                                                          |                               |                        |                                      |
|-------|----------------------------------------------------------|-------------------------------|------------------------|--------------------------------------|
| 10467 | Arachidic acid                                           | -                             | Barley; Wheat          | Bollina, 2011;<br>Paranidharan, 2008 |
| 10607 | (-)-Podophyllotoxin                                      | -                             | Wheat (Sumai-3)        | Gunnaiah, 2014                       |
| 10690 | D-Gluconate                                              | -                             | Barley                 | Bollina, 2010                        |
| 10742 | syringic acid                                            | -                             | wheat                  | Bourigny, 2008                       |
| 10932 | beta-aminobutyric acid                                   | -                             | hormon                 | Petti, 2012                          |
| 11005 | Myristic acid                                            | Tetradecanoic acid            | wheat                  | Hamzehzarghani, 2005                 |
| 12020 | 1-penten-3-ol                                            | -                             | Chickpea volatiles     | Cruz, 2012                           |
| 12530 | Tridecanoic acid                                         | -                             | wheat                  | Paranidharan, 2008                   |
| 13577 | trans-2-hexen-1-ol                                       | -                             | Chickpea volatiles     | Cruz, 2012                           |
| 14259 | Eicosanoic acid, methyl ester                            | -                             | wheat                  | Hamzehzarghani, 2005                 |
| 14925 | 1,2,3-Propanetricarboxylic acid                          | tricarballic acid             | Wheat                  | Hamzehzarghani, 2012                 |
| 15608 | Tridecanoic acid, 12-methyl-, methyl ester               | -                             | wheat                  | Hamzehzarghani, 2005                 |
| 16251 | 3,4-dimethoxy-phenol                                     | -                             | Chickpea volatiles     | Cruz, 2012                           |
| 28557 | 1,4,7,10,13,16-hexaoxacyclooctadecane                    | -                             | Chickpea volatiles     | Cruz, 2012                           |
| 31251 | nonanoic acid-ethyl ester                                | -                             | Chickpea volatiles     | Cruz, 2012                           |
| 31260 | 3-methyl-1-butanol                                       | -                             | Chickpea volatiles     | Cruz, 2012                           |
| 31404 | butylated hydroxytoluene                                 | -                             | Chickpea volatiles     | Cruz, 2012                           |
| 33037 | glucaric acid                                            | -                             | wheat                  | Paranidharan, 2008                   |
| 34756 | S-adenosyl-L-methionine                                  | -                             | Wheat                  | Gunnaiah, 2012                       |
| 47945 | Dihydro-7-hydroxymyoporone                               | -                             | barley                 | Bollina, 2011                        |
| 65084 | Gallocatechin-4 $\beta$ -ol                              | -                             | barley                 | Bollina, 2011                        |
| 65098 | norvaline                                                | -                             | wheat                  | Paranidharan, 2008                   |
| 68077 | Tangeretin                                               | -                             | barley                 | Bollina, 2011                        |
| 68482 | N-Benzoylanthranilic acid                                | -                             | barley                 | Bollina, 2011                        |
| 69867 | Indole-3-carboxylic acid $\beta$ -d-glucopyranosyl ester | -                             | barley                 | Bollina, 2011                        |
| 70639 | 3-Methylxanthine                                         | -                             | barley                 | Bollina, 2010                        |
| 72276 | Epicatechin                                              | -                             | barley                 | Bollina, 2011                        |
| 72277 | Epigallocatechin                                         | -                             | Wheat (Sumai-3)        | Gunnaiah, 2014                       |
| 72965 | Ailanthone                                               | -                             | Wheat (Sumai-3)        | Gunnaiah, 2014                       |
| 73399 | (+)-pinoselinol                                          | -                             | Wheat (Sumai-3)        | Gunnaiah, 2014                       |
| 73432 | Brusatol                                                 | -                             | barley                 | Chamarthi, 2014                      |
| 75891 | N-methyl- $\beta$ -alanine                               | 3-(methylamino)propanoic acid | Wheat (Sumai-3)        | Gunnaiah, 2014                       |
| 79025 | D-Glucose                                                | Glucopyranose                 | wheat                  | Hamzehzarghani, 2012                 |
| 79075 | 2-Monostearin                                            | -                             | wheat                  | Hamzehzarghani, 2012                 |
| 83064 | Ribofuranose-1,2,3,5-tetra                               | -                             | wheat                  | Hamzehzarghani, 2012                 |
| 84298 | Asperuloside                                             | -                             | barley                 | Chamarthi, 2014                      |
| 87691 | Loganin                                                  | -                             | wheat                  | Gunnaiah, 2012                       |
| 88708 | Gentiopicrin                                             | -                             | barley                 | Chamarthi, 2014                      |
| 91458 | Aucubin                                                  | -                             | wheat; Wheat (Sumai-3) | Gunnaiah, 2012;<br>Gunnaiah, 2014    |

|        |                                                                   |                                                    |                 |                                                   |
|--------|-------------------------------------------------------------------|----------------------------------------------------|-----------------|---------------------------------------------------|
| 91493  | 6-Phospho-D-gluconate                                             |                                                    | wheat           | Gunnaiah, PhD                                     |
| 92794  | Prunin                                                            | Naringenin 7-O-beta-D-glucoside                    | barley; wheat   | Chamarthi, 2014;<br>Gunnaiah, 2012; Bollina, 2010 |
| 92817  | Melezitose                                                        | -                                                  | Wheat           | Hamzehzarghani, PhD                               |
| 92836  | 2-Hydroxypalmitic acid                                            | 2-hydroxyhexadecanoic acid                         | Wheat           | Gunnaiah, PhD                                     |
| 92891  | L-Albizziiine                                                     | -                                                  | Wheat (Sumai-3) | Gunnaiah, 2014                                    |
| 92904  | Indolelactate                                                     | -                                                  | Wheat (Sumai-3) | Gunnaiah, 2014                                    |
| 94253  | Juanislamin                                                       | sesquiterpenic lactone similar to:judaicin         | barley          | Bollina, 2010                                     |
| 95259  | xylose                                                            | -                                                  | wheat           | Hamzehzarghani, PhD                               |
| 96118  | 4',5,6,7-Tetramethoxyflavone                                      | -                                                  | Wheat (Sumai-3) | Gunnaiah, 2014                                    |
| 97214  | 3',5-Dihydroxy-4',6,7-trimethoxyflavone                           | -                                                  | wheat           | Gunnaiah, PhD                                     |
| 97332  | Quercetin pentamethyl ether                                       | -                                                  | barley          | Bollina, 2011                                     |
| 99535  | Podolide/Gibberlin A7                                             | -                                                  | Wheat (Sumai-3) | Gunnaiah, 2014                                    |
| 99748  | Phenylacetaldoxime                                                | -                                                  | barley          | Bollina, 2011                                     |
| 119205 | Matairesinol                                                      | -                                                  | barley          | Bollina, 2011                                     |
| 120678 | Quinovic acid                                                     | -                                                  | barley          | Bollina, 2010                                     |
| 121947 | shikimate-3-phosphate                                             | shikimic acid-3-phosphate                          | Wheat           | Gunnaiah, PhD                                     |
| 122667 | 4'-Demethylpodophyllotoxin                                        | -                                                  | barley          | Bollina, 2011                                     |
| 124021 | $\beta$ -Glucogallin                                              | -                                                  | barley          | Bollina, 2010                                     |
| 128708 | should be: 2-naphthol 6'-O-malonylglucoside                       | available id:<br>4-phenyl-6-O-malonylglucoside     | Wheat (Sumai-3) | Gunnaiah, 2014                                    |
| 131248 | Benzyl alcohol beta-D-xylopyranosyl (1->6)-beta-D-glucopyranoside | benzyl alcohol xylopyranosyl-(1-6)-glucopyranoside | Wheat           | Gunnaiah, PhD                                     |
| 131420 | Mucronulatol-(4->) naringenin                                     | similar to: astraisoflavanin                       | barley          | Bollina, 2007                                     |
| 145689 | 2-Hydroxy-3-methylcarbazole                                       | -                                                  | barley          | Bollina, 2011                                     |
| 145742 | L-Proline                                                         | -                                                  | wheat           | Hamzehzarghi, 2005                                |
| 150893 | Heptamethoxyflavone                                               | -                                                  | wheat           | Gunnaiah, PhD                                     |
| 151152 | Trihydroxybutyric acid                                            | -                                                  | wheat           | Hamzehzarghi, PhD                                 |
| 152430 | 5,2',5'-Trihydroxy-3,6,7,4'-tetramethoxyflavone 5'-glucoside      | -                                                  | barley          | Bollina, 2010                                     |
| 155094 | 6-Prenylnaringenin                                                | -                                                  | barley; wheat   | Bollina, 2010; Gunnaiah, PhD                      |
| 158280 | 7,4'-dihydroxyflavan                                              | -                                                  | barley          | Bollina, 2011                                     |
| 159171 | PM-toxin B                                                        | -                                                  | barley          | Chamarthi, 2014                                   |
| 159223 | PM-toxin A                                                        | -                                                  | barley          | Chamarthi, 2014                                   |
| 159578 | 2-Oxo-6-dehydroxyneoisatin                                        | -                                                  | barley          | Bollina, 2011                                     |
| 161496 | Bruceine B                                                        | -                                                  | Wheat (Sumai-3) | Gunnaiah, 2014                                    |
| 165275 | Mevalonic acid 5-pyrophosphate                                    | 5-Diphosphomevalonic acid                          | barley          | Bollina, 2011                                     |
| 167792 | gulose                                                            | -                                                  | wheat           | Paranidharan, 2008                                |
| 171489 | 5-O-methylembelin                                                 | -                                                  | barley          | Chamarthi, 2014                                   |

|        |                                                |                                        |                         |                                    |
|--------|------------------------------------------------|----------------------------------------|-------------------------|------------------------------------|
| 173651 | Compactin diol lactone                         | -                                      | barley                  | Chamarthi, 2014                    |
| 182279 | Tarennoside                                    | -                                      | Wheat (Sumai-3)         | Gunnaiah, 2014                     |
| 193042 | (-)-Dihydrocubebin                             | -                                      | barley                  | Bollina, 2010                      |
| 219899 | Arabinoic acid                                 | -                                      | wheat                   | Hamzehzarghani, PhD                |
| 255320 | Methyl pentofuranoside                         | Lyxofuranoside (similar)               | Wheat                   | Hamzehzarghani, PhD                |
| 315709 | 3,6,7,4'-tetramethoxyflavone                   | -                                      | barley                  | Bollina, 2007                      |
| 332427 | Lariciresinol                                  | -                                      | Wheat                   | Gunnaiah, PhD                      |
| 345501 | Deoxy podophyllotoxin                          | -                                      | Wheat                   | Gunnaiah, 2012                     |
| 354446 | Loganin                                        | -                                      | Wheat (Sumai-3)         | Gunnaiah, 2014                     |
| 439155 | 2-S-adenosyl-L-homocysteine                    | -                                      | Wheat                   | Gunnaiah, 2012                     |
| 439230 | Mevalonic acid                                 | -                                      | barley                  | Bollina, 2007                      |
| 439503 | Salicylic acid 2-O-b-D-glucoside               | salicin                                | Wheat                   | Gunnaiah, 2012                     |
| 439514 | scopolin                                       | Scopoloside                            | Wheat                   | Hamzehzarghani, PhD                |
| 439664 | Chlorophyllide                                 | -                                      | Wheat (Sumai-3)         | Gunnaiah, 2014                     |
| 439709 | $\beta$ -D-fructofuranose/ $\alpha$ -D-glucose | -                                      | Wheat (Sumai-3)         | Gunnaiah, 2014                     |
| 440074 | <i>trans</i> -Hydroxy-D-proline                | -                                      | Wheat                   | Gunnaiah, PhD                      |
| 440349 | N-Succinyl-L-amino-6-oxopimelate               | -                                      | Wheat (Sumai-3)         | Gunnaiah, 2014                     |
| 441802 | Isobrucein A                                   | -                                      | barley; Wheat (Sumai-3) | Chamarthi, 2014;<br>Gunnaiah, 2014 |
| 441905 | Astragaloside III                              | -                                      | barley                  | Bollina, 2010                      |
| 442036 | Hallactone B                                   | -                                      | barley; wheat           | Chamarthi, 2014;<br>Gunnaiah, PhD  |
| 442044 | Inumakilactone A glycoside                     | -                                      | barley                  | Chamarthi, 2014                    |
| 442425 | Ipolamiide                                     | -                                      | barley                  | Chamarthi, 2014                    |
| 442428 | 2-Hydroxyisoflavanone naringenin               | -                                      | Wheat                   | Gunnaiah, 2012                     |
| 442457 | 5'-Prenylhomoeriodictyol                       | -                                      | Wheat (Sumai-3)         | Gunnaiah, 2014                     |
| 442670 | Cajanol/flavonoids(+)-Pisatin                  | -                                      | Wheat (Sumai-3)         | Gunnaiah, 2014                     |
| 442770 | ( $\pm$ )-5-deoxykievitone                     | -                                      | barley                  | Bollina, 2011                      |
| 442830 | Acanthoside D                                  | (-)-Syringaresinol di-beta-D-glucoside | barley                  | Chamarthi, 2014;<br>Bollina, 2011  |
| 442831 | 1-Acetoxy-pinoreosinol                         | -                                      | barley                  | Bollina, 2011                      |
| 442833 | Cleistanthin A                                 | -                                      | Wheat (Sumai-3)         | Gunnaiah, 2014                     |
| 442836 | Medioresinol 4'-O-beta-D-glucopyranoside       | -                                      | Wheat                   | Gunnaiah, 2012                     |
| 443012 | Valeroidine                                    | -                                      | barley                  | Bollina, 2011                      |
| 443015 | Podorhizol beta-D-glucoside                    | -                                      | barley                  | Chamarthi, 2014                    |
| 443024 | Acanthoside B                                  | -                                      | Wheat (Sumai-3)         | Gunnaiah, 2014                     |
| 443320 | 16-epivellosimine                              | -                                      | barley, wheat           | Chamarthi, 2014,<br>Gunnaiah, 2012 |
| 443328 | Lamioside                                      | -                                      | Wheat (Sumai-3)         | Gunnaiah, 2014                     |
| 443335 | Iridotrial glucoside                           | -                                      | Wheat                   | Gunnaiah, 2012                     |
| 443340 | 10-Hydroxyloganin                              | -                                      | Wheat                   | Gunnaiah, 2012                     |

|         |                                                                                                            |                                 |                        |                                                           |
|---------|------------------------------------------------------------------------------------------------------------|---------------------------------|------------------------|-----------------------------------------------------------|
| 443349  | 7-dehydrologanin tetraacetate                                                                              | -                               | barley                 | Chamarthi, 2014                                           |
| 443352  | Deutzioside                                                                                                | -                               | Wheat                  | Gunnaiah, 2012                                            |
| 444212  | aconitic acid                                                                                              | -                               | wheat                  | Paranidharan, 2008                                        |
| 444539  | cinnamic acid                                                                                              | -                               | Wheat                  | Gunnaiah, 2012;<br>Hamazehzarghani, 2005                  |
| 444791  | D-Glucuronic acid                                                                                          | -                               | Wheat                  | Hamazehzarghani, PhD                                      |
| 444972  | fumaric acid                                                                                               | -                               | wheat                  | Paranidharan, 2008                                        |
| 445638  | Palmitoleate                                                                                               | -                               | barley                 | Chamarthi, 2014                                           |
| 445639  | Oleic acid                                                                                                 | -                               | barley                 | Bollina, 2011                                             |
| 445858  | <i>cis</i> -ferulic acid                                                                                   | 4-methoxycinnamic acid          | wheat, barley          | Boutigny, 2010; Bollina, 2011                             |
| 452855  | Trachelogenin/Medioresinol                                                                                 | -                               | Wheat                  | Gunnaiah, PhD                                             |
| 467296  | Epicatechin 3- <i>O</i> -(3- <i>O</i> -methylgallate)                                                      | -                               | Wheat (Sumai-3)        | Gunnaiah, 2014                                            |
| 514181  | Phyllanthusmin B                                                                                           | -                               | Wheat                  | Gunnaiah, 2012                                            |
| 519748  | Benzene, (1-Butylpentyl)-                                                                                  | -                               | Wheat                  | Hamazehzarghani, 2005                                     |
| 615196  | 1-DL-(indole-3-acetyl)-myo-inositol                                                                        | -                               | barley                 | Bollina, 2011                                             |
| 621824  | 2,4,6-Tri- <i>t</i> -butylbenzenethiol                                                                     | -                               | wheat                  | Hamzhezarghani, PhD                                       |
| 636543  | Cadabicine                                                                                                 | -                               | Wheat (Sumai-3)        | Gunnaiah, 2014                                            |
| 636550  | Formosanatin A                                                                                             | -                               | Wheat (Sumai-3)        | Gunnaiah, 2014                                            |
| 637090  | <i>trans</i> -2-Butenoic acid                                                                              | crotonic acid                   | Wheat                  | Hamzhezarghani, PhD                                       |
| 637542  | <i>p</i> -coumaric acid                                                                                    | -                               | wheat; barley          | Boutigny, 2010;<br>Hamazehzarghani, PhD;<br>Bollina, 2010 |
| 637760  | chalcones                                                                                                  | -                               | general resistance     | Lattanzio, 2006                                           |
| 637775  | Sinapinic acid                                                                                             | SINAPIC ACID                    | Wheat; barley          | Gunnaiah, 2012;<br>Boutigny, 2010; Bollina, 2011          |
| 641663  | <i>trans</i> - <i>p</i> -Ferulyl alcohol<br>4- <i>O</i> -[6-(2-methyl-3-hydroxypropionyl)] glucopyranoside | -                               | barley                 | Bollina, 2010; 2011                                       |
| 643757  | <i>cis</i> -aconitate                                                                                      | -                               | wheat                  | Gunnaiah, PhD                                             |
| 689043  | caffeic acid                                                                                               | Caffeyl alcohol                 | Wheat                  | Gunnaiah, PhD                                             |
| 709625  | Cinnamoylglycine                                                                                           | -                               | barley                 | Bollina, 2011                                             |
| 1560034 | L-quinatate                                                                                                | -                               | Wheat (Sumai-3)        | Gunnaiah, 2014                                            |
| 3010930 | Hydroxypinoresinol                                                                                         | -                               | Wheat (Sumai-3)        | Gunnaiah, 2014                                            |
| 3035544 | 6-methoxypodophyllotoxin                                                                                   | -                               | barley                 | Chamarthi, 2014                                           |
| 3036184 | (3-Phenylpropionyl) glycine methyl ester                                                                   | -                               | barley                 | Bollina, 2011                                             |
| 3084296 | Citrusin B                                                                                                 | -                               | Wheat (Sumai-3)        | Gunnaiah, 2014                                            |
| 3084507 | 5,4'-dihydroxy-3,6,7,8,2'-pentamethoxyflavone                                                              | -                               | barley                 | Bollina, 2011                                             |
| 5273569 | fraxetin                                                                                                   | 7,8-Dihydroxy-6-methoxycoumarin | barley                 | Bollina, 2011                                             |
| 5274622 | threo-carolignan E                                                                                         | -                               | Wheat (Sumai-3)        | Gunnaiah, 2014                                            |
| 5280372 | Coniferin                                                                                                  | -                               | Wheat; Wheat (Sumai-3) | Gunnaiah, 2012;                                           |

|         |                                         |                                                      |                         |                                                          |
|---------|-----------------------------------------|------------------------------------------------------|-------------------------|----------------------------------------------------------|
|         |                                         |                                                      |                         | Gunnaiah, 2014                                           |
| 5280378 | Formononetin                            | -                                                    | Wheat                   | Gunnaiah, PhD                                            |
| 5280406 | 1-O-sinapoyl-beta-D-glucose             | Trans- <i>p</i> -sinapoyl $\beta$ -D-glucopyranoside | barley                  | Chamarthi, 2014;<br>Bollina, 2011                        |
| 5280443 | Apigenin                                | -                                                    | barley                  | Bollina, 2011                                            |
| 5280445 | Luteolin                                | -                                                    | Wheat                   | Gunnaiah, PhD                                            |
| 5280486 | Raucaffricine                           | -                                                    | barley                  | Chamarthi, 2014                                          |
| 5280507 | Sinapyl-alcohol                         | -                                                    | Wheat (Sumai-3)         | Gunnaiah, 2014                                           |
| 5280536 | Coniferyl aldehyde                      | -                                                    | Wheat                   | Gunnaiah, PhD                                            |
| 5280536 | Coniferaldehyde                         | -                                                    | Wheat (Sumai-3)         | Gunnaiah, 2014                                           |
| 5280637 | Cynarside                               | -                                                    | Wheat                   | Gunnaiah, PhD                                            |
| 5280802 | Sinapaldehyde                           | -                                                    | Wheat                   | Gunnaiah, 2012;<br>Gunnaiah, 2014                        |
| 5280847 | 4-Hydroxycinnamyl alcohol 4-D-glucoside | -                                                    | Wheat (Sumai-3)         | Gunnaiah, 2014                                           |
| 5280863 | Kaempferol                              | -                                                    | barley                  | Bollina, 2010                                            |
| 5280896 | ( <i>s</i> )-(+)-Abscisic acid          | Abscisic acid                                        | barley                  | Bollina, 2011                                            |
| 5280933 | gamma-Linolenic Acid                    | 9,12,15-Octadecatrienoic acid                        | Wheat; barley           | Gunnaiah, 2012;<br>Hamzehzarghani, PhD;<br>Bollina, 2011 |
| 5280934 | $\alpha$ -Linolenate                    | -                                                    | barley; wheat           | Chamarthi, 2014;<br>Gunnaiah, 2014                       |
| 5281166 | jasmonic acid                           | -                                                    | Wheat                   | Gunnaiah, 2012                                           |
| 5281167 | <i>cis</i> -3-hexen-1-ol                | -                                                    | Chickpea volatiles      | Cruz, 2012                                               |
| 5281168 | <i>trans</i> -2-hexenal                 | -                                                    | Chickpea volatiles      | Cruz, 2012                                               |
| 5281204 | Tuberonic acid glucoside                | -                                                    | barley                  | Chamarthi, 2014                                          |
| 5281380 | Ceceline                                | -                                                    | Wheat (Sumai-3)         | Gunnaiah, 2014                                           |
| 5281440 | Eleganin                                | -                                                    | Wheat (Sumai-3)         | Gunnaiah, 2014                                           |
| 5281542 | Harpagoside                             | -                                                    | Wheat (Sumai-3)         | Gunnaiah, 2014                                           |
| 5281601 | 5,6-Dimethoxyflavone                    | -                                                    | Wheat                   | Gunnaiah, 2012                                           |
| 5281638 | 6-Hydroxykaempferol                     | -                                                    | barley; wheat           | Bollina, 2010; Gunnaiah,<br>PhD                          |
| 5281677 | Quercetin 7,3',4'-trimethyl ether       | -                                                    | Wheat (Sumai-3)         | Gunnaiah, 2014                                           |
| 5281691 | Rhamnetin                               | -                                                    | Wheat (Sumai-3)         | Gunnaiah, 2014                                           |
| 5281712 | Astringin                               | -                                                    | barley                  | Bollina, 2011                                            |
| 5281724 | 4'-Prenyloxyresveratrol                 | -                                                    | barley; Wheat (Sumai-3) | Bollina, 2011; Gunnaiah,<br>2014                         |
| 5281737 | Macrophylline                           | -                                                    | barley                  | Bollina, 2011                                            |
| 5281760 | 1-Caffeoyl-4-deoxyquinic acid           | -                                                    | Wheat                   | Gunnaiah, PhD                                            |
| 5281762 | 5-O-Caffeoylshikimic acid               | -                                                    | Wheat                   | Gunnaiah, PhD                                            |
| 5281770 | Diferulic acid                          | -                                                    | Wheat (Sumai-3)         | Gunnaiah, 2014                                           |
| 5281789 | Licoisoflavone A                        | -                                                    | barley                  | Bollina, 2010                                            |



|         |                                                                                 |                                                                     |                 |                                                |
|---------|---------------------------------------------------------------------------------|---------------------------------------------------------------------|-----------------|------------------------------------------------|
| 5281796 | Feruloylputrescine                                                              | -                                                                   | Wheat           | Gunnaiah, 2012                                 |
| 5281862 | Urushiol III                                                                    | -                                                                   | barley          | Chamarthi, 2014                                |
| 5281929 | (-)-jasmonic acid methyl ester                                                  | -                                                                   | barley          | Chamarthi, 2014                                |
| 5282066 | 1,3-dihydroxy- <i>N</i> -methylacridone                                         | -                                                                   | barley          | Chamarthi, 2014                                |
| 5282224 | Abscisic aldehyde                                                               | -                                                                   | Wheat           | Gunnaiah, 2012                                 |
| 5282225 | Abscisic alcohol                                                                | -                                                                   | Wheat           | Gunnaiah, 2012                                 |
| 5282316 | 8,11-Octadecadienoic acid                                                       | -                                                                   | wheat           | Hamzehzarghani, PhD                            |
| 5282745 | 9-Hexadecenoic acid                                                             | palmitoleic acid                                                    | Wheat           | Hamzehzarghani, PhD                            |
| 5282797 | 9,12-Octadecadienoic acid                                                       | -                                                                   | barley          | Bollina, 2011                                  |
| 5283028 | Traumatic acid                                                                  | -                                                                   | barley          | Chamarthi, 2014                                |
| 5288227 | Maleate                                                                         | maleic acid                                                         | Wheat (Sumai-3) | Gunnaiah, 2014                                 |
| 5312942 | 8-oxo-9,11-octadecadiynoic acid                                                 | 9,11-Octadecadiynoic acid, 8-oxo-                                   | barley          | Bollina, 2011                                  |
| 5314312 | Methylcinnamate                                                                 | -                                                                   | Wheat           | Gunnaiah, PhD                                  |
| 5315175 | Vellosimine                                                                     | -                                                                   | Wheat (Sumai-3) | Gunnaiah, 2014                                 |
| 5315908 | (+)-pinoresinol 4- <i>O</i> -(6- <i>O</i> -galloyl)- $\beta$ -D-glucopyranoside | -                                                                   | Wheat (Sumai-3) | Gunnaiah, 2014                                 |
| 5315911 | Cinnamoyltyramine                                                               | -                                                                   | Wheat           | Gunnaiah, 2012                                 |
| 5316673 | Kaempferol 3-rhamnoside                                                         | afzelin                                                             | wheat; barley   | Gunnaiah, 2012; Bollina, 2010                  |
| 5316860 | Syringin                                                                        | Syringoside                                                         | Wheat           | Gunnaiah, 2012; Gunnaiah, 2014                 |
| 5318045 | ( <i>Z</i> )-3-Hexenyl beta-d-glucopyranoside                                   | AC1NSWB1                                                            | barley          | Bollina, 2011                                  |
| 5318865 | Kukoamine A                                                                     | -                                                                   | barley          | Chamarthi, 2014                                |
| 5320863 | Quercetin-3-D-xyloside                                                          | Kaempferol 3-xyloside                                               | barley          | Bollina, 2011                                  |
| 5358847 | Auriculatin                                                                     | -                                                                   | barley          | Bollina, 2010                                  |
| 5366244 | 3,7,11,15-Tetramethyl-2-hexadecen-1-ol                                          | -                                                                   | Wheat           | Hamzehzarghani, PhD                            |
| 5379033 | Dehydrodiisoeugenol                                                             | -                                                                   | Wheat           | Gunnaiah, PhD                                  |
| 5379081 | 5,6-Dihydroxy-7,8,4'-trimethoxyflavone                                          | -                                                                   | Wheat           | Gunnaiah, PhD                                  |
| 5383409 | Scoparin                                                                        | -                                                                   | barley          | Bollina, 2010                                  |
| 5458272 | Eupacunolin                                                                     | -                                                                   | barley          | Chamarthi, 2014                                |
| 5458468 | (2 <i>S</i> ,3 <i>S</i> )-2-Hydroxytridecane-1,2,3-tricarboxylate               | -                                                                   | Wheat (Sumai-3) | Gunnaiah, 2014                                 |
| 5458879 | <i>p</i> -coumaroylserotonin                                                    | -                                                                   | barley; wheat   | Chamarthi, 2014; Gunnaiah, 2012; Pasquet, 2014 |
| 5461017 | arachidate                                                                      | icosanoate                                                          | barley          | Chamarthi, 2014                                |
| 5462438 | Psychotrine                                                                     | -                                                                   | barley          | Bollina, 2011                                  |
| 5481665 | Isorhamnetin 3-rutinoside-7-glucoside                                           | -                                                                   | barley          | Bollina, 2010                                  |
| 5486199 | Kaempferitrin                                                                   | -                                                                   | Wheat           | Gunnaiah, PhD                                  |
| 5716902 | 3-oxo-2-(2-entenyl) cyclopentanoctanoic acid                                    | -                                                                   | barley          | Bollina, 2011                                  |
| 5771760 | 1-Hexadecanoyl-sn-glycero-3-phospho-(1'-myo-inositol)                           | 1-(9 <i>Z</i> -octadecenoyl)-sn-glycero-3-phospho-(1'-myo-inositol) | Wheat           | Gunnaiah, PhD                                  |
| 5862476 | Geranyl cinnamate                                                               | AG-G-80757                                                          | barley          | Bollina, 2011                                  |

|          |                                                                                                                                                                   |                                                                      |                 |                                                     |
|----------|-------------------------------------------------------------------------------------------------------------------------------------------------------------------|----------------------------------------------------------------------|-----------------|-----------------------------------------------------|
| 5945639  | alpha,alpha'-Diethyl-4,4'-bis(2-propynyloxy)stilbene<br>Vendors                                                                                                   | -                                                                    | Wheat           | Gunnaiah, PhD                                       |
| 5969616  | Feruloylserotonin                                                                                                                                                 | -                                                                    | Wheat           | Gunnaiah, 2012;<br>Gunnaiah, 2014;<br>Pasquet, 2014 |
| 6325261  | 3'-O-beta-Glucopyranosyl plumbagic acid methyl ester                                                                                                              | AC1O3DCX                                                             | barley          | Bollina, 2011                                       |
| 6437066  | Salannin                                                                                                                                                          | -                                                                    | barley          | Chamarthi, 2014                                     |
| 6438621  | Seselinol                                                                                                                                                         | -                                                                    | barley          | Bollina, 2010; 2011                                 |
| 6439562  | p-Coumaroylputrescine                                                                                                                                             | -                                                                    | Wheat           | Gunnaiah, 2012                                      |
| 6440550  | 4-Coumaroylcholine                                                                                                                                                | 2-[(E)-3-(4-hydroxyphenyl)prop-2-enoyl<br>loxyethyl-trimethylazanium | Wheat           | Gunnaiah, PhD                                       |
| 6440783  | 3-O-caffeoylquinic acid                                                                                                                                           | -                                                                    | barley          | Bollina, 2011                                       |
| 6441485  | xanthoxin                                                                                                                                                         | -                                                                    | Wheat           | Gunnaiah, 2012                                      |
| 6454248  | Doryanine                                                                                                                                                         | -                                                                    | barley          | Bollina, 2011                                       |
| 6479876  | Apigenin 7-O-beta-D-glucuronide                                                                                                                                   | -                                                                    | Wheat; barley   | Gunnaiah, PhD; Bollina,<br>2011                     |
| 6992086  | L-Glutamine                                                                                                                                                       | -                                                                    | Wheat (Sumai-3) | Gunnaiah, 2014                                      |
| 6992089  | L-asparagine                                                                                                                                                      | -                                                                    | Wheat (Sumai-3) | Gunnaiah, 2014                                      |
| 6995277  | D-threonine or Homoserine                                                                                                                                         | -                                                                    | Wheat (Sumai-3) | Gunnaiah, 2014                                      |
| 9543641  | 6Z-Octene-2,4-diyonic acid                                                                                                                                        | -                                                                    | Wheat           | Gunnaiah, PhD                                       |
| 9547268  | (6RS)-22-oxo-23,24,25,26,27-pentanorvitamin D3 6,19-sulfur<br>dioxide<br>adduct/(6RS)-22-oxo-23,24,25,26,27-pentanorcholecalciferol<br>6,19-sulfur dioxide adduct | -                                                                    | Wheat (Sumai-3) | Gunnaiah, 2014                                      |
| 9548810  | Omega-Hydroxydodecanoic acid                                                                                                                                      | -                                                                    | barley          | Bollina, 2010                                       |
| 9548881  | 2,3-Dinor-8-iso-prostaglandin-F2alpha                                                                                                                             | 2,3-Dinor-8-iso PGF2alpha                                            | barley          | Chamarthi, 2014                                     |
| 9548882  | 2,3-Dinor-8-iso prostaglandin F1alpha                                                                                                                             | 2,3-Dinor-8-iso PGF1alpha                                            | barley          | Chamarthi, 2014                                     |
| 9799386  | 5-O-Feruloylquinic acid                                                                                                                                           | -                                                                    | Wheat (Sumai-3) | Gunnaiah, 2014;<br>Pasquet, 2014                    |
| 9817274  | Sappanone a                                                                                                                                                       | -                                                                    | barley          | Bollina, 2011                                       |
| 9843255  | Quercetageitin 5,6,7,3',4'-pentamethyl ether                                                                                                                      | -                                                                    | Wheat           | Gunnaiah, PhD                                       |
| 9995324  | Cinnamoylserotonin                                                                                                                                                | -                                                                    | barley; wheat   | Chamarthi, 2014;<br>Gunnaiah, PhD                   |
| 10038072 | Cyathocaline                                                                                                                                                      | -                                                                    | barley          | Bollina, 2011                                       |
| 10131281 | N-decanoyl-l-homoserine lactone                                                                                                                                   | CHEMBL8799                                                           | barley          | Bollina, 2011                                       |
| 10345235 | Segetalin B                                                                                                                                                       | -                                                                    | barley          | Bollina, 2010                                       |
| 10382485 | 6-Prenylapigenin                                                                                                                                                  | -                                                                    | barley          | Bollina, 2011                                       |
| 10427023 | Phytocassane B                                                                                                                                                    | -                                                                    | barley          | Bollina, 2011                                       |
| 10483858 | Segetalin A                                                                                                                                                       | -                                                                    | barley          | Bollina, 2011                                       |
| 10685477 | Enterolactone                                                                                                                                                     | -                                                                    | Wheat           | Gunnaiah, PhD                                       |
| 10794070 | Isogambogic acid                                                                                                                                                  | -                                                                    | barley          | Bollina, 2011                                       |

|          |                                                              |           |                                     |                                    |
|----------|--------------------------------------------------------------|-----------|-------------------------------------|------------------------------------|
| 10877291 | Arabinofuranose                                              | -         | Wheat                               | Hamzehzarghani, PhD                |
| 11067541 | Catechin 5,7,3'-trimethyl ether                              | -         | Wheat (Sumai-3)                     | Gunnaiah, 2014                     |
| 11561034 | Trans-Zeatin riboside monophosphate                          | -         | barley                              | Bollina, 2011                      |
| 11694869 | dehydroabietinal                                             | -         | Systemic acquired resistance factor | D'Maris, 2012                      |
| 11824478 | Dehydrodiconiferyl alcohol                                   | -         | barley                              | Bollina, 2011                      |
| 11825308 | 1 $\beta$ -(3-Hydroxy-4,5-dimethoxyphenyl)-O-glucopyranoside | -         | barley                              | Bollina, 2011                      |
| 11953806 | Vomilenine                                                   | -         | Wheat                               | Gunnaiah, 2012                     |
| 12306850 | Anisatin                                                     | -         | Wheat (Sumai-3)                     | Gunnaiah, 2014                     |
| 13916049 | Ferulic acid 7-O-glucoside                                   | NP-015589 | Wheat                               | Gunnaiah, 2012                     |
| 13963770 | 5-hydroxy-7,8-dimethoxyflavanone                             | -         | Wheat                               | Gunnaiah, 2012                     |
| 14162696 | Quercetin 3,7-dimethyl ether                                 | -         | barley                              | Bollina, 2011                      |
| 14162697 | Quercetin 3,5,3'-trimethyl ether                             | -         | Wheat                               | Gunnaiah, PhD                      |
| 14237661 | Lupinisoiflavone G                                           | -         | Wheat (Sumai-3)                     | Gunnaiah, 2014                     |
| 14583601 | Ulexone B                                                    | -         | Wheat (Sumai-3)                     | Gunnaiah, 2014                     |
| 14825498 | Ramontoside                                                  | -         | Wheat (Sumai-3)                     | Gunnaiah, 2014                     |
| 15071430 | Murranimbine                                                 | -         | barley                              | Bollina, 2010                      |
| 15838234 | Unanisoiflavan                                               | -         | Wheat                               | Gunnaiah, PhD                      |
| 15939882 | 12-Cytisineacetamide                                         | -         | barley                              | Bollina, 2011                      |
| 15954045 | Mg-Protoporphyrin                                            | -         | barley                              | Chamarthi, 2014                    |
| 16061038 | 9S-hydroxy-10E,12Z-octadecadienoic acid (9(S)-HODE)          | -         | Wheat                               | Gunnaiah, 2012                     |
| 16129778 | tannic acid                                                  | -         | general resistance                  | Lattanzio, 2006                    |
| 16659826 | Caffeoylserotonin                                            | -         | Wheat                               | Gunnaiah, 2012                     |
| 21226108 | Secologanin                                                  | -         | barley                              | Chamarthi, 2014;<br>Bollina, 2011  |
| 21270557 | 9-oxo-nonanoate                                              | -         | barley                              | Chamarthi, 2014                    |
| 21574272 | grandmarin                                                   | -         | barley                              | Bollina, 2007                      |
| 21676366 | Catechin 7-O-apiofuranoside                                  | -         | barley                              | Bollina, 2011                      |
| 22298557 | cis-Reserveratrol-3,4-o- $\beta$ -glucoside                  | -         | Wheat (Sumai-3)                     | Gunnaiah, 2014                     |
| 23259413 | Methylphopogonone B                                          | -         | Wheat (Sumai-3)                     | Gunnaiah, 2014                     |
| 23724737 | Cyanidin 3-O-glucoside                                       | -         | barley                              | Bollina, 2011                      |
| 24779499 | 2-valeryl-sn-glycero-3-phosphocholine                        | -         | Wheat                               | Gunnaiah, PhD                      |
| 24779520 | 1-pentyl-sn-glycero-3-phosphocholine                         | -         | Wheat                               | Gunnaiah, PhD                      |
| 24892796 | Glutathionylaminopropylcadaverine                            | -         | Wheat                               | Gunnaiah, PhD                      |
| 25200803 | 3-hydroxy-15-dihydrolobimin                                  | -         | barley; Wheat (Sumai-3)             | Chamarthi, 2014;<br>Gunnaiah, 2014 |
| 25201445 | Secologanate                                                 | -         | Wheat (Sumai-3)                     | Gunnaiah, 2014                     |
| 25201518 | 10,16-Dihydroxyhexadecanoate                                 | -         | barley                              | Bollina, 2010                      |
| 25202084 | O-phospho-L-tyrosine                                         | -         | Wheat (Sumai-3)                     | Gunnaiah, 2014                     |
| 25202368 | Isovitexin-7-O-glucosyl-2''O-rhamnoside                      | -         | barley                              | Chamarthi, 2014                    |
| 25202794 | Kaempferol-3-rhamnoside                                      | -         | Wheat (Sumai-3)                     | Gunnaiah, 2014                     |

|          |                                                                                                      |                                 |                 |                                                       |
|----------|------------------------------------------------------------------------------------------------------|---------------------------------|-----------------|-------------------------------------------------------|
| 25203018 | Isoscoparin                                                                                          | -                               | barley          | Bollina, 2011                                         |
| 25244083 | 3-oxo-2-( <i>cis</i> -2'-pentenyl)-cyclopentane-1-octanoate                                          | OPC8                            | barley          | Chamarthi, 2014                                       |
| 25244213 | 4-coumaroylquininate                                                                                 | -                               | Wheat           | Gunnaiah, 2012;<br>Pasquet, 2014                      |
| 25244310 | Dihydroconiferyl alcohol glucoside                                                                   | -                               | barley, wheat   | Chamarthi, 2014;<br>Gunnaiah, 2012;<br>Gunnaiah, 2014 |
| 25244544 | Sinapaldehyde glucoside                                                                              | -                               | Wheat           | Gunnaiah, 2012                                        |
| 25244639 | 13( <i>S</i> )-hydroperoxy linolenic acid                                                            | hydroperoxylinolenic acid       | barley; wheat   | Bollina, 2011;Chamarthi,<br>2014; Gunnaiah, 2012      |
| 25244952 | 7-deoxyloganin                                                                                       | -                               | Wheat (Sumai-3) | Gunnaiah, 2014                                        |
| 25245116 | 4-coumaroylshikimate                                                                                 | -                               | Wheat           | Gunnaiah, 2012                                        |
| 25245404 | 8'-hydroxyabscisate                                                                                  | -                               | Wheat           | Gunnaiah, 2012                                        |
| 25245507 | 18-oxo-oleate                                                                                        | -                               | barley          | Chamarthi, 2014                                       |
| 25245514 | 4-coumaroylagmatine                                                                                  | <i>cis-p</i> -Coumaroylagmatine | barley, wheat   | Chamarthi, 2014;<br>Gunnaiah, 2012; Bollina,<br>2011  |
| 25245732 | 9,10-epoxy-18-hydroxystearate                                                                        | -                               | barley          | Chamarthi, 2014                                       |
| 25245966 | <i>N</i> -Caffeoylputrescine                                                                         | -                               | Wheat (Sumai-3) | Gunnaiah, 2014                                        |
| 25246059 | 12-oxo- <i>cis</i> -10,15-phytodienoate                                                              | -                               | barley          | Chamarthi, 2014                                       |
| 40467846 | 2-phospho-D-glycerate                                                                                | -                               | Wheat (Sumai-3) | Gunnaiah, 2014                                        |
| 42607580 | 2',4',4-Trihydroxy-3',3-dimethoxychalcone 4'- <i>O</i> -glucoside                                    | LMPK12120180                    | Wheat           | Gunnaiah, PhD                                         |
| 42607603 | Chalconaringenin 2'-rhamnosyl-(1->4)-xyloside                                                        | -                               | Wheat           | Gunnaiah, PhD                                         |
| 42607604 | Chalconaringenin 2'-rhamnosyl-(1->4)-xyloside                                                        | -                               | Wheat (Sumai-3) | Gunnaiah, 2014                                        |
| 42607625 | 3,4',6'-Trihydroxy-4,2'-dimethoxychalcone 4'- <i>O</i> -rutinoside                                   | -                               | Wheat (Sumai-3) | Gunnaiah, 2014                                        |
| 42607738 | Furano[2'',3'':6,7]aurone                                                                            | -                               | Wheat (Sumai-3) | Gunnaiah, 2014                                        |
| 42607881 | 5- <i>O</i> -Methylleridol                                                                           | -                               | barley          | Bollina, 2011                                         |
| 42607913 | 5,7,4'-Trihydroxyflavanone 7- <i>O</i> -arabinosylglucoside                                          | -                               | Wheat           | Gunnaiah, PhD                                         |
| 42607916 | 5,7,4'-Trihydroxyflavanone 4'- <i>O</i> -xylosylglucoside                                            | -                               | Wheat           | Gunnaiah, PhD                                         |
| 42607925 | Naringenin 7- <i>O</i> -(2'',6''-di- <i>O</i> - $\alpha$ -rhamnopyranosyl)- $\beta$ -glucopyranoside | -                               | Wheat (Sumai-3) | Gunnaiah, 2014                                        |
| 42608018 | 4'-Hydroxy-5,7,2'-trimethoxyflavanone 4'-rhamnosyl-(1->6)-glucoside                                  | -                               | Wheat (Sumai-3) | Gunnaiah, 2014                                        |
| 42608074 | 5-Hydroxy-7,4'-dimethoxy-6,8-di- <i>C</i> -prenylflavanone 5- <i>O</i> -galactoside                  | -                               | Wheat (Sumai-3) | Gunnaiah, 2014                                        |
| 42608082 | Persiconin                                                                                           | -                               | Wheat           | Gunnaiah, PhD                                         |
| 44123342 | Jasmonoyl valine                                                                                     | -                               | Wheat           | Gunnaiah, 2012                                        |
| 44229226 | Dopaquinone                                                                                          | -                               | Wheat (Sumai-3) | Gunnaiah, 2014                                        |
| 44237241 | 2-(6'-methylthio)hexylmalate                                                                         | -                               | Wheat           | Gunnaiah, PhD                                         |
| 44256626 | Pelargonidin 3-rutinoside-7-(6-( <i>p</i> -hydroxybenzoyl)glucoside)                                 | -                               | Wheat           | Gunnaiah, PhD                                         |

|          |                                                                              |                                                   |                 |                                   |
|----------|------------------------------------------------------------------------------|---------------------------------------------------|-----------------|-----------------------------------|
| 44256707 | Cyanidin<br>3-[6-(6- <i>p</i> -hydroxybenzoylglucosyl)-2-xylosylgalactoside] | -                                                 | Wheat (Sumai-3) | Gunnaiah, 2014                    |
| 44257034 | Malvidin 3- <i>O</i> -glucoside                                              | -                                                 | Wheat (Sumai-3) | Gunnaiah, 2014                    |
| 44257078 | Catechin 3- <i>O</i> - $\alpha$ -L-rhamnoside                                | -                                                 | barley          | Bollina, 2007                     |
| 44257132 | Pneumatopterin A                                                             | -                                                 | Wheat (Sumai-3) | Gunnaiah, 2014                    |
| 44257154 | Catechin-4-ol 3- <i>O</i> - $\beta$ -D-galactopyranoside                     | -                                                 | barley          | Bollina, 2011                     |
| 44257384 | Dalpanin                                                                     | Vitexin 2''- <i>O</i> -( <i>E</i> )-ferulate      | barley          | Chamarthi, 2014;<br>Bollina, 2011 |
| 44257722 | Hemsleyanoside                                                               | -                                                 | barley          | Bollina, 2010                     |
| 44257728 | Isovitexin 2''- <i>O</i> -(6'''-feruloyl)glucoside                           | -                                                 | Wheat (Sumai-3) | Gunnaiah, 2014                    |
| 44257742 | Isovitexin-7- <i>O</i> -xyloside                                             | -                                                 | barley          | Chamarthi, 2014                   |
| 44257823 | Apigenin 7- rutinoside                                                       | -                                                 | Wheat (Sumai-3) | Gunnaiah, 2014                    |
| 44257987 | Isoorientin 4'- <i>O</i> -glucoside-2''- <i>O</i> -( <i>E</i> )-caffeate     | -                                                 | Wheat (Sumai-3) | Gunnaiah, 2014                    |
| 44258179 | Isoscoparin 7- <i>O</i> -glucoside                                           | -                                                 | barley          | Bollina, 2011                     |
| 44258273 | Tricin 7-rutinoside                                                          | -                                                 | barley          | Bollina, 2011                     |
| 44258526 | 7-Methoxy-5,6,3\ '4\ '-bis(methylenedioxy)flavone                            | -                                                 | Wheat           | Gunnaiah, PhD                     |
| 44258551 | Skullcapflavone I 2'-(4''- <i>E</i> -cinnamoylglucoside)                     | -                                                 | barley          | Bollina, 2011                     |
| 44258567 | Isoscutellarein 7-xyloside                                                   | -                                                 | barley          | Bollina, 2010                     |
| 44258812 | Kaempferol-3-glucoside-7-rhamnoside                                          | -                                                 | barley          | Chamarthi, 2014;<br>Bollina, 2010 |
| 44259085 | Kaempferide 3-glucoside-7-rhamnoside                                         | -                                                 | barley          | Bollina, 2011                     |
| 44259493 | Syringetin 3-rutinoside                                                      | -                                                 | barley          | Bollina, 2010                     |
| 44259592 | Rhamnetin 3-rhamninoside                                                     | -                                                 | barley          | Bollina, 2010                     |
| 44259659 | Quercetin 3- <i>O</i> -methyl 7- <i>O</i> -galactoside                       | -                                                 | barley          | Bollina, 2011                     |
| 44259865 | 5,4\ '-Dihydroxy-3,6,3\ '-trimethoxy-7-prenyloxyflavone                      | -                                                 | Wheat           | Gunnaiah, PhD                     |
| 44567511 | Kadsulignan                                                                  | -                                                 | Wheat (Sumai-3) | Gunnaiah, 2014                    |
| 44577222 | Vanilloloside                                                                | -                                                 | Wheat           | Gunnaiah, PhD                     |
| 46173242 | 4-coumaroyl-3-hydroxyagmatine                                                | -                                                 | Wheat (Sumai-3) | Gunnaiah, 2014                    |
| 46173376 | Feruloylagmatine                                                             | -                                                 | Wheat           | Gunnaiah, 2012                    |
| 46173811 | (+)-Abscisyl $\beta$ -D-glucopyranoside                                      | abscisic acid- $\beta$ -D-glucopyranosyl<br>ester | Wheat           | Gunnaiah, 2012;<br>Gunnaiah, 2014 |
| 46891830 | 1-(9E-octadecenoyl)-sn-glycero-3-phospho-(1'-sn-glycerol)                    | -                                                 | Wheat           | Gunnaiah, PhD                     |
| 49859717 | indole-3-butyryl-glucose                                                     | -                                                 | Wheat (Sumai-3) | Gunnaiah, 2014                    |
| 51399546 | 7-Deoxyloganate                                                              | -                                                 | Wheat           | Gunnaiah, 2012                    |
| 52940260 | (+)-lariciresinol                                                            | -                                                 | Wheat (Sumai-3) | Gunnaiah, 2014                    |
| 52940854 | Cryptomeridiol                                                               | -                                                 | barley          | Chamarthi, 2014                   |
| 53326135 | Magnaldehyde B                                                               | -                                                 | Wheat           | Gunnaiah, PhD                     |
| 53486401 | Secoisolariciresinol di- <i>O</i> -glucoside                                 | -                                                 | Wheat           | Gunnaiah, 2012                    |
| 53887649 | Pentadecnoic acid, 14-methyl-, methyl ester, (270)                           | -                                                 | Wheat           | Hamzehzarghi, 2005                |
| 54710960 | Sinapate                                                                     | -                                                 | barley          | Bollina, 2010                     |
| 54740347 | primary fluorescent chlorophyll catabolite                                   | -                                                 | barley          | Chamarthi, 2014                   |

|                        |                                                                                                |                                                                                                              |                     |                     |
|------------------------|------------------------------------------------------------------------------------------------|--------------------------------------------------------------------------------------------------------------|---------------------|---------------------|
| 54758681               | (+)-7-iso-jasmonoyl-L-isoleucine                                                               | -                                                                                                            | Wheat               | Gunnaiah, 2012      |
| 56660526               | Cineracipadesin F                                                                              | -                                                                                                            | barley              | Bollina, 2011       |
| 56670862               | 7-Methoxygambogellic acid                                                                      | -                                                                                                            | barley              | Bollina, 2011       |
| 56936277               | Butyl 3-O-β-D-glucopyranosyl-butanoate                                                         | -                                                                                                            | Wheat (Sumai-3)     | Gunnaiah, 2014      |
| 57397163               | Piloside B                                                                                     | -                                                                                                            | barley              | Bollina, 2011       |
| 71442684               | (+)-Rangiformic acid                                                                           | similar to:<br>1-methoxycarbonylheptadecane-1,1,2-tricarboxylate                                             | barley              | Bollina, 2011       |
| 71752010               | Triacetyl resveratrol                                                                          | -                                                                                                            | barley              | Bollina, 2011       |
| 54685734               | Dimoracin                                                                                      | -                                                                                                            | Wheat (Sumai-3)     | Gunnaiah, 2014      |
| 471912                 | β-D-glucopyranosyl-caffeic acid                                                                | -                                                                                                            | Wheat               | Gunnaiah, 2012      |
| <b>KNAPsAcK (C_ID)</b> | <b>Metabolite</b>                                                                              | <b>Synonym</b>                                                                                               | <b>Plant origin</b> | <b>Reference</b>    |
| C00010776              | Sylvestroside III                                                                              | -                                                                                                            | barley              | Bollina, 2010       |
| C00027255              | 6'-O-α-D-Xylopyranosylalanside                                                                 | -                                                                                                            | barley              | Bollina, 2010       |
| C00022795              | 16-Diacetoxy-7 α-hydroxy-18-malonyloxy-ent-cleroda-3-ene                                       | -                                                                                                            | barley              | Bollina, 2010; 2011 |
| C00010714              | 7-O-(4-methoxycinnamoyl) tecomoside                                                            | -                                                                                                            | barley              | Bollina, 2010; 2011 |
| C00025375              | Acetyllycoclavine                                                                              | -                                                                                                            | barley              | Bollina, 2011       |
| C00028282              | Fumariflorine                                                                                  | -                                                                                                            | barley              | Bollina, 2011       |
| C00036128              | Isovaleroyloxylinool                                                                           | -                                                                                                            | barley              | Bollina, 2011       |
| C00037495              | Methyl 6-O- <i>p</i> -trans-coumaroyl-β-D-glucopyranoside                                      | -                                                                                                            | barley              | Bollina, 2011       |
| C00019437              | Auriculatin 4'-O-Glucoside                                                                     | 7,6-(2''',2'''-dimethyl-2-H-pyrano)-2',5-dihydroxy-8-(3,3-dimethylallyl)-isoflavone<br>4'-O-beta-D-glucoside | barley              | Bollina, 2011       |
| C00036353              | 7-Oxomatairesinol                                                                              | -                                                                                                            | Wheat               | Gunnaiah, PhD       |
| C00007576              | Indole-3-carboxylic acid β-D-glucopyranosyl ester                                              | -                                                                                                            | Wheat (Sumai-3)     | Gunnaiah, 2014      |
| C00000120              | alpha-N-carbomethoxyacetyl-D-4-chlorotryptophan                                                | -                                                                                                            | Wheat (Sumai-3)     | Gunnaiah, 2014      |
| C00013945              | b-D-fructosyl-a-D-(6-O-(E))-feruloylglucoside                                                  | -                                                                                                            | Wheat (Sumai-3)     | Gunnaiah, 2014      |
| C00024026              | 6'-O-( <i>p</i> -Coumaroyl)-procumbide                                                         | -                                                                                                            | Wheat (Sumai-3)     | Gunnaiah, 2014      |
| C00050612              | (+)-Medioresinol di-O-β-glucopyranoside                                                        | -                                                                                                            | Wheat (Sumai-3)     | Gunnaiah, 2014      |
| <b>HMDB (HMDB_ID)</b>  | <b>Metabolite</b>                                                                              | <b>Synonym</b>                                                                                               | <b>Plant Origin</b> | <b>Reference</b>    |
| HMDB41579              | 3b,6a-Dihydroxy-alpha-ionol 9-[apiosyl-(1->6)-glucoside]                                       | -                                                                                                            | Wheat (Sumai-3)     | Gunnaiah, 2014      |
| HMDB41676              | 4-Methyl(-)-epigallocatechin 7-glucuronide                                                     | -                                                                                                            | Wheat (Sumai-3)     | Gunnaiah, 2014      |
| HMDB32743              | Phloracetophenone-[xylosyl-(1->6)-glucoside]                                                   | -                                                                                                            | Wheat (Sumai-3)     | Gunnaiah, 2014      |
| HMDB36214              | 6-Feruloylglucose 2,3,4-trihydroxy-3-methylbutylglycoside                                      | -                                                                                                            | Wheat (Sumai-3)     | Gunnaiah, 2014      |
| <b>ChEBI (CHEBID)</b>  | <b>Metabolite</b>                                                                              | <b>Synonym</b>                                                                                               | <b>Plant Origin</b> | <b>Reference</b>    |
| CHEBI:16099            | (E)-Feruloyl-3-(arabinosylxylose), <i>cis-p</i> -Coumaric acid<br>4-[apiosyl-(1->2)-glucoside] | -                                                                                                            | Wheat (Sumai-3)     | Gunnaiah, 2014      |
|                        | 16-Diacetoxy-7 a-hydroxy-18-malonyloxyent-cleroda-3-ene                                        | -                                                                                                            | barley              | Bollina, 2011       |
